# Supplementary material
Source: Springer Nature journal article supplement (https://www.springermedizin.de/resource/supplementary/12958_2010_771_MOESM2_ESM.pdf/9568460)

Primary tumor (T4)

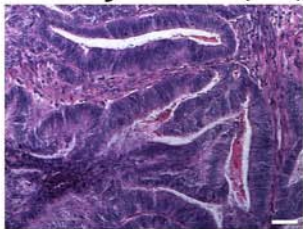

1<sup>st</sup> Transplant

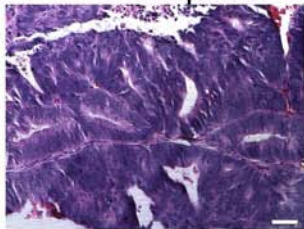

2<sup>nd</sup> Transplant

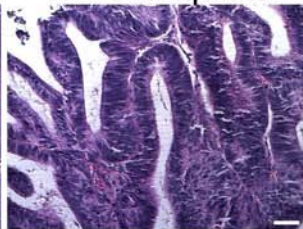

3<sup>rd</sup> Transplant

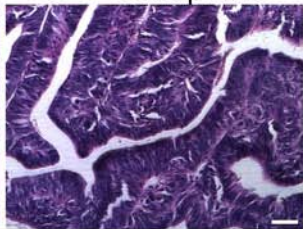

Supplement: MOESM2 [file 9568460]
